# Supplementary material for: Label-free, direct localization and relative quantitation of the RNA nucleobase methylations m6A, m5C, m3U, and m5U by top-down mass spectrometry
Source: PubMed Central journal article supplement — Nucleic Acids Res. 2017 May 26;45(13):8014–25. doi: 10.1093/nar/gkx470 (PMC5570050; doi:10.1093/nar/gkx470), 2017-05-26
Supplement: gkx470_supp.pdf [file gkx470_supp.pdf]

## Label-free, direct localization and relative quantitation of the RNA nucleobase methylations $m^6A$ , $m^5C$ , $m^3U$ , and $m^5U$ by top-down mass spectrometry

H. Glasner, C. Riml, R. Micura, and K. Breuker

### Calculation of average charge values and RNA (M-nH) $^{n-}$ ion yields

Average charge values,  $z_{av}$ , were calculated from (M-nH) $^{n-}$  ion abundances,  $A(n)$ , and charge values,  $n$ , as

$$z_{av} = \sum_n n \cdot A(n) / \sum_n A(n)$$

(M-nH) $^{n-}$  ion yields for each form  $i$  were calculated from (M-nH) $^{n-}$  ion abundances  $A(n,i)$  relative to all ion abundances as

$$yield = 100 \cdot \sum_n A(n,i) / \sum_{n,i} A(n,i)$$

**Table S1.** Average charge ( $z_{av}$ ) and yield of (M-nH) $^{n-}$  ions from ESI of 1:1 mixtures (0.5 or 1  $\mu$ M each in 1:1 H<sub>2</sub>O/CH<sub>3</sub>OH) of 27 nt RNAs **7** and **11** with 0 and 2  $m^5C$  modifications, respectively, with ammonium acetate (20 mM), piperidine and imidazole (30 mM each), or piperidine (30 mM) as additives.

| CH <sub>3</sub> COONH <sub>4</sub> | $z_{av}$     | 4-  | 5-   | 6-   | 7-   | 8-  | 9-  | 10-  | 11-  | 12-  | 13- | 14- | 15- | $\Sigma$ | corrected yield [%] |
|------------------------------------|--------------|-----|------|------|------|-----|-----|------|------|------|-----|-----|-----|----------|---------------------|
| RNA <b>7</b>                       | <b>5.51</b>  | 0.3 | 29.5 | 22.1 | 2.5  | 0.4 | 0.1 |      |      |      |     |     |     | 54.9     | 53.9                |
| RNA <b>11</b>                      | <b>5.58</b>  | 0.2 | 21.5 | 20.6 | 2.4  | 0.3 | 0.1 |      |      |      |     |     |     | 45.1     | 46.1                |
| piperidine/<br>imidazole           |              |     |      |      |      |     |     |      |      |      |     |     |     |          |                     |
| RNA <b>7</b>                       | <b>6.21</b>  | 0.2 | 9.5  | 29.6 | 11.0 | 3.8 | 0.8 |      |      |      |     |     |     | 54.9     | 53.9                |
| RNA <b>11</b>                      | <b>6.23</b>  | 0.1 | 7.6  | 23.4 | 9.9  | 3.3 | 0.6 |      |      |      |     |     |     | 45.1     | 46.1                |
| piperidine                         |              |     |      |      |      |     |     |      |      |      |     |     |     |          |                     |
| RNA <b>7</b>                       | <b>11.44</b> |     |      |      |      | 0.1 | 2.0 | 10.6 | 14.5 | 11.9 | 7.2 | 2.8 | 0.4 | 49.6     | 48.6                |
| RNA <b>11</b>                      | <b>11.40</b> |     |      |      |      | 0.0 | 1.1 | 12.0 | 15.2 | 12.9 | 6.4 | 2.5 | 0.3 | 50.4     | 51.4                |

$n$ - corresponds to (M - nH) $^{n-}$ , in %

**Table S2.** Fragments from CAD of (M-6H) $^{6-}$  ions at 96 eV laboratory frame energy, mass and  $m/z$  values refer to the monoisotopic peak.

| $m/z$ measured | $z$ | relative abundance | $m$ measured [Da] | assignment           |
|----------------|-----|--------------------|-------------------|----------------------|
| 679.08124      | 2   | 16,571,015         | 1360.17703        | $a_5$ -G             |
| 873.09819      | 3   | 40,747,040         | 2622.31641        | $a_9$ -G             |
| 1310.14839     | 2   | 42,201,822         | 2622.31134        | $a_9$ -G             |
| 988.11435      | 3   | 13,136,460         | 2967.36488        | $a_{10}$ -C          |
| 1089.79612     | 3   | 6,732,168          | 3272.41019        | $a_{11}$ -C          |
| 1297.82658     | 3   | 12,820,510         | 3896.50157        | $a_{13}$ <b>m</b> -A |
| 1293.15290     | 3   | 29,471,482         | 3882.48053        | $a_{13}$ -A          |

## Supplementary Material

|            |   |                                    |            |                |
|------------|---|------------------------------------|------------|----------------|
| 1606.52867 | 3 | 24,108,883                         | 4822.60784 | $a_{16}$ -G    |
| 1463.42452 | 4 | 20,217,943                         | 5857.72720 | $a_{19}$ -G    |
| 1705.71079 | 4 | 30,946,969                         | 6826.87227 | $a_{22}$ _m-G  |
| 1632.40336 | 5 | 13,432,977                         | 8167.05316 | $a_{26}$ _m-A  |
| 634.07070  | 1 | 74,185,032                         | 635.07798  | $c_2$          |
| 939.11238  | 1 | 276,980,586                        | 940.11965  | $c_3$          |
| 622.06483  | 2 | 61,779,766                         | 1246.14421 | $c_4$          |
| 1245.13512 | 1 | 173,761,710                        | 1246.14239 | $c_4$          |
| 794.58894  | 2 | 132,737,067                        | 1591.19244 | $c_5$          |
| 947.10992  | 2 | 264,593,876                        | 1896.23439 | $c_6$          |
| 891.58847  | 2 | 10,296,201                         | 1785.19149 | $c_6$ -C       |
| 1100.12048 | 2 | 216,198,429                        | 2202.25552 | $c_7$          |
| 1032.59458 | 2 | 14,153,533                         | 2067.20371 | $c_7$ -A       |
| 835.08794  | 3 | 73,327,348                         | 2508.28565 | $c_8$          |
| 1253.13595 | 2 | 223,010,735                        | 2508.28644 | $c_8$          |
| 950.10310  | 3 | 108,950,292                        | 2853.33112 | $c_9$          |
| 899.75517  | 3 | 10,279,405                         | 2702.28734 | $c_9$ -G       |
| 1051.78414 | 3 | 122,006,718                        | 3158.37426 | $c_{10}$       |
| 1056.45430 | 3 | 55,709,726                         | 3172.38474 | $c_{10}$ _m    |
| 1153.46464 | 3 | 127,958,183                        | 3463.41574 | $c_{11}$       |
| 1158.13554 | 3 | 63,264,810                         | 3477.42844 | $c_{11}$ _m    |
| 1255.14566 | 3 | 164,849,480                        | 3768.45880 | $c_{12}$       |
| 1259.81391 | 3 | 94,313,724                         | 3782.46355 | $c_{12}$ _m    |
| 1204.79402 | 3 | 9,699,088                          | 3617.40389 | $c_{12}$ -G    |
| 1364.82930 | 3 | 77,642,600                         | 4097.50974 | $c_{13}$       |
| 1369.50216 | 3 | 47,047,117                         | 4111.52831 | $c_{13}$ _m    |
| 1466.83382 | 3 | 75,269,704                         | 4403.52330 | $c_{14}$       |
| 1471.50869 | 3 | 37,680,640                         | 4417.54790 | $c_{14}$ _m    |
| 1568.51275 | 3 | 186,623,931                        | 4708.56009 | $c_{15}$       |
| 1573.18430 | 3 | 88,992,294                         | 4722.57473 | $c_{15}$ _m    |
| 1518.17038 | 3 | 10,203,683                         | 4557.53296 | $c_{15}$ -G    |
| 1262.39589 | 4 | 26,977,716                         | 5053.61265 | $c_{16}$       |
| 1683.53367 | 3 | 130,257,206                        | 5053.62284 | $c_{16}$       |
| 1265.90378 | 4 | 12,256,063                         | 5067.64421 | $c_{16}$ _m    |
| 1688.20717 | 3 | 71,363,624                         | 5067.64333 | $c_{16}$ _m    |
| 1348.66206 | 4 | 49,047,854                         | 5398.67736 | $c_{17}$       |
| 1798.53992 | 3 | 64,286,066                         | 5398.64160 | $c_{17}$       |
| 1352.16420 | 4 | 23,640,986                         | 5412.68590 | $c_{17}$ _m    |
| 1803.21135 | 3 | 31,861,861                         | 5412.65589 | $c_{17}$ _m    |
| 1434.92266 | 4 | 67,319,517                         | 5743.71975 | $c_{18}$       |
| 1913.55950 | 3 | 34,802,879                         | 5743.70033 | $c_{18}$       |
| 1438.43087 | 4 | overlaps with (M-6H) <sup>6-</sup> | 5757.75259 | $c_{18}$ _m    |
| 1918.22888 | 3 | 17,215,131                         | 5757.70847 | $c_{18}$ _m    |
| 1521.18272 | 4 | 39,154,302                         | 6088.75997 | $c_{19}$       |
| 1524.69048 | 4 | 18,480,989                         | 6102.79104 | $c_{19}$ _m    |
| 1597.44046 | 4 | 30,456,848                         | 6393.79093 | $c_{20}$       |
| 1600.94188 | 4 | 67,767,806                         | 6407.79664 | $c_{20}$ _m    |
| 1563.18787 | 4 | 11,614,931                         | 6256.78059 | $c_{20}$ _m-G  |
| 1677.20249 | 4 | 280,840,253                        | 6712.83906 | $c_{21}$ _m    |
| 1643.43828 | 4 | 22,339,513                         | 6577.78224 | $c_{21}$ _m-A  |
| 1639.43905 | 4 | 49,585,368                         | 6561.78532 | $c_{21}$ _m-G  |
| 1682.69945 | 4 | 53,181,165                         | 6734.82691 | $c_{21}$ _m+Na |
| 1763.46644 | 4 | 90,314,569                         | 7057.89487 | $c_{22}$ _m    |
| 1729.70644 | 4 | 11,836,733                         | 6922.85488 | $c_{22}$ _m-A  |
| 1725.70790 | 4 | 26,182,423                         | 6906.86072 | $c_{22}$ _m-G  |
| 1471.58385 | 5 | 104,412,022                        | 7362.95565 | $c_{23}$ _m    |
| 1839.72614 | 4 | 173,144,390                        | 7362.93368 | $c_{23}$ _m    |
| 1805.95635 | 4 | 16,237,689                         | 7227.85449 | $c_{23}$ _m-A  |

## Supplementary Material

|            |   |                                    |            |                             |
|------------|---|------------------------------------|------------|-----------------------------|
| 1801.95771 | 4 | 33,114,735                         | 7211.85993 | $c_{23}$ m-G                |
| 1845.21704 | 4 | 35,954,119                         | 7384.89727 | $c_{23}$ m+Na               |
| 1540.58774 | 5 | 194,601,490                        | 7707.97509 | $c_{24}$ m                  |
| 1513.57694 | 5 | 15,375,051                         | 7572.92109 | $c_{24}$ m-A                |
| 1510.37957 | 5 | 54,691,886                         | 7556.93422 | $c_{24}$ m-G                |
| 1536.98557 | 5 | 8,847,989                          | 7689.96423 | $c_{24}$ m-H <sub>2</sub> O |
| 1544.98408 | 5 | 43,524,450                         | 7729.95680 | $c_{24}$ m+Na               |
| 1609.60051 | 5 | 87,553,971                         | 8053.03893 | $c_{25}$ m                  |
| 1579.39097 | 5 | 28,372,840                         | 7901.99124 | $c_{25}$ m-G                |
| 1396.00446 | 6 | 54,640,662                         | 8382.07041 | $c_{26}$ m                  |
| 1370.83297 | 6 | 15,517,003                         | 8231.04147 | $c_{26}$ m-G                |
| 994.12896  | 1 | 28,071,918                         | 995.13624  | GGCcP internal fragment     |
| 652.08156  | 1 | 24,620,899                         | 653.08884  | $w_2$                       |
| 997.12822  | 1 | 74,538,213                         | 998.13549  | $w_3$                       |
| 670.58397  | 2 | 10,277,568                         | 1343.18249 | $w_4$                       |
| 823.10496  | 2 | 80,521,204                         | 1648.22448 | $w_5$                       |
| 995.62947  | 2 | 19,946,624                         | 1993.27349 | $w_6$                       |
| 1148.14791 | 2 | 20,139,178                         | 2298.31037 | $w_7$                       |
| 1155.15982 | 2 | 9,164,595                          | 2312.33419 | $w_7$ m                     |
| 866.77729  | 3 | 3,977,196                          | 2603.35370 | $w_8$                       |
| 1300.67061 | 2 | 20,596,467                         | 2603.35578 | $w_8$                       |
| 871.45036  | 3 | 9,886,686                          | 2617.37290 | $w_8$ m                     |
| 1307.67513 | 2 | 49,620,368                         | 2617.36482 | $w_8$ m                     |
| 986.46556  | 3 | 16,807,248                         | 2962.41850 | $w_9$ m                     |
| 1096.80958 | 3 | 9,473,177                          | 3293.45057 | $w_{10}$                    |
| 1101.48028 | 3 | 23,460,610                         | 3307.46267 | $w_{10}$ m                  |
| 1211.82417 | 3 | 12,773,059                         | 3638.49434 | $w_{11}$                    |
| 1216.49643 | 3 | 28,525,614                         | 3652.51112 | $w_{11}$ m                  |
| 1331.51488 | 3 | 6,859,993                          | 3997.56647 | $w_{12}$ m                  |
| 1535.19937 | 3 | 21,184,212                         | 4608.61995 | $w_{14}$ m                  |
| 1462.18987 | 4 | 27,368,341                         | 5852.78857 | $w_{18}$ m                  |
| 1949.93158 | 3 | 19,802,012                         | 5852.81656 | $w_{18}$ m                  |
| 1777.72989 | 4 | 16,808,435                         | 7114.94867 | $w_{22}$ m                  |
| 1395.16752 | 6 | 19,338,884                         | 8377.04878 | $w_{26}$ m                  |
| 572.11478  | 1 | 75,291,262                         | 573.12205  | $y_2$                       |
| 917.16210  | 1 | 532,453,169                        | 918.16938  | $y_3$                       |
| 630.60148  | 2 | 140,882,532                        | 1263.21751 | $y_4$                       |
| 1262.20766 | 1 | 320,095,829                        | 1263.21494 | $y_4$                       |
| 783.12169  | 2 | 145,644,597                        | 1568.25794 | $y_5$                       |
| 955.64534  | 2 | 480,725,898                        | 1913.30524 | $y_6$                       |
| 888.11798  | 2 | 10,652,173                         | 1778.25051 | $y_6$ -A                    |
| 880.12125  | 2 | 26,978,252                         | 1762.25705 | $y_6$ -G                    |
| 1108.16537 | 2 | 137,334,230                        | 2218.34529 | $y_7$                       |
| 1115.17505 | 2 | 68,894,275                         | 2232.36465 | $y_7$ m                     |
| 1260.68447 | 2 | 43,966,216                         | 2523.38349 | $y_8$                       |
| 1267.69673 | 2 | 86,777,990                         | 2537.40802 | $y_8$ m                     |
| 955.13704  | 3 | 25,462,325                         | 2868.43295 | $y_9$                       |
| 1433.21600 | 2 | 36,552,890                         | 2868.44656 | $y_9$                       |
| 959.80941  | 3 | 54,976,734                         | 2882.45005 | $y_9$ m                     |
| 1440.19492 | 2 | overlaps with (M-6H) <sup>6-</sup> | 2882.40438 | $y_9$ m                     |
| 1070.15459 | 3 | 55,138,627                         | 3213.48560 | $y_{10}$                    |
| 1074.82469 | 3 | 101,710,787                        | 3227.49589 | $y_{10}$ m                  |
| 1612.74295 | 2 | 46,150,431                         | 3227.50046 | $y_{10}$ m                  |
| 1024.47590 | 3 | 11,945,591                         | 3076.44953 | $y_{10}$ m-G                |
| 1019.80185 | 3 | 6,695,167                          | 3062.42738 | $y_{10}$ -G                 |
| 1185.16853 | 3 | 64,343,063                         | 3558.52742 | $y_{11}$                    |
| 1189.84288 | 3 | 141,475,842                        | 3572.55047 | $y_{11}$ m                  |
| 1785.26660 | 2 | 22,847,560                         | 3572.54776 | $y_{11}$ m                  |

|            |   |             |            |                      |
|------------|---|-------------|------------|----------------------|
| 1139.49009 | 3 | 18,644,302  | 3421.49211 | y <sub>11_m-G</sub>  |
| 1134.82119 | 3 | 13,980,151  | 3407.48539 | y <sub>11-G</sub>    |
| 1300.18662 | 3 | 86,851,297  | 3903.58168 | y <sub>12</sub>      |
| 1304.85509 | 3 | 167,744,310 | 3917.58710 | y <sub>12_m</sub>    |
| 1254.50981 | 3 | 40,797,590  | 3766.55125 | y <sub>12_m-G</sub>  |
| 1249.83442 | 3 | 22,873,249  | 3752.52508 | y <sub>12-G</sub>    |
| 1401.86455 | 3 | 31,892,563  | 4208.61547 | y <sub>13</sub>      |
| 1406.54036 | 3 | 71,825,994  | 4222.64292 | y <sub>13_m</sub>    |
| 1503.87380 | 3 | 19,979,011  | 4514.64322 | y <sub>14</sub>      |
| 1508.54377 | 3 | 46,262,608  | 4528.65313 | y <sub>14_m</sub>    |
| 1458.19718 | 3 | 12,306,888  | 4377.61337 | y <sub>14_m-G</sub>  |
| 1613.55969 | 3 | 47,667,362  | 4843.70090 | y <sub>15</sub>      |
| 1618.23329 | 3 | 92,767,678  | 4857.72170 | y <sub>15_m</sub>    |
| 1715.23159 | 3 | 34,450,180  | 5148.71659 | y <sub>16</sub>      |
| 1719.90879 | 3 | 75,963,400  | 5162.74820 | y <sub>16_m</sub>    |
| 1669.55548 | 3 | 15,089,481  | 5011.68826 | y <sub>16_m-G</sub>  |
| 1816.92064 | 3 | 37,378,183  | 5453.78376 | y <sub>17</sub>      |
| 1821.59567 | 3 | 63,618,959  | 5467.80883 | y <sub>17_m</sub>    |
| 1771.24472 | 3 | 22,758,405  | 5316.75599 | y <sub>17_m-G</sub>  |
| 1923.26909 | 3 | 65,017,677  | 5772.82909 | y <sub>18_m</sub>    |
| 1528.46718 | 4 | 98,938,786  | 6117.89784 | y <sub>19_m</sub>    |
| 2038.27684 | 3 | 33,126,958  | 6117.85234 | y <sub>19_m</sub>    |
| 1490.69730 | 4 | 17,106,026  | 5966.81829 | y <sub>19_m-G</sub>  |
| 1604.96475 | 4 | 85,078,280  | 6423.88811 | y <sub>20_m</sub>    |
| 1567.20383 | 4 | 28,353,736  | 6272.84442 | y <sub>20_m-G</sub>  |
| 1681.47538 | 4 | 117,505,554 | 6729.93064 | y <sub>21_m</sub>    |
| 1643.71456 | 4 | 27,803,786  | 6578.88735 | y <sub>21_m-G</sub>  |
| 1686.97369 | 4 | 22,136,948  | 6751.92387 | y <sub>21_m+Na</sub> |
| 1757.73037 | 4 | 69,791,727  | 7034.95060 | y <sub>22_m</sub>    |
| 1719.97176 | 4 | 18,307,038  | 6883.91616 | y <sub>22_m-G</sub>  |
| 1475.00021 | 5 | 30,968,984  | 7380.03744 | y <sub>23_m</sub>    |
| 1843.99325 | 4 | 58,345,103  | 7380.00211 | y <sub>23_m</sub>    |
| 1536.20088 | 5 | 84,083,082  | 7686.04080 | y <sub>24_m</sub>    |
| 1505.99587 | 5 | 13,357,995  | 7535.01574 | y <sub>24_m-G</sub>  |
| 1597.20696 | 5 | 51,730,122  | 7991.07119 | y <sub>25_m</sub>    |
| 1658.41849 | 5 | 87,382,577  | 8297.12882 | y <sub>26_m</sub>    |
| 1628.20373 | 5 | 23,410,650  | 8146.05502 | y <sub>26_m-G</sub>  |

**Table S3.** Stoichiometry of 23 nt RNA isomers **18-20** (m<sup>5</sup>C) electrosprayed from a 3  $\mu$ M (1  $\mu$ M each) solution in 3:1 H<sub>2</sub>O/CH<sub>3</sub>OH with 25 mM ammonium acetate derived from CAD of (M-5H)<sup>5-</sup> ions (average from triplicate measurements at 85, 87.5, and 90 eV laboratory frame energy).

| RNA       | % from CAD       |
|-----------|------------------|
| <b>18</b> | 35.24 $\pm$ 0.75 |
| <b>19</b> | 35.84 $\pm$ 2.23 |
| <b>20</b> | 28.92 $\pm$ 1.48 |

**Table S4.** Stoichiometry of a mixture of 23 nt RNA isomers **4, 16, and 17** (m<sup>6</sup>A) electrosprayed from a 3.1  $\mu$ M (RNA **4**: 1  $\mu$ M, RNA **16**: 1  $\mu$ M, RNA **17**: 1.1  $\mu$ M) solution in 1:1 H<sub>2</sub>O/CH<sub>3</sub>OH with 20 mM ammonium acetate derived from CAD of (M-5H)<sup>5-</sup> ions (average from triplicate measurements at 75, 77.5, and 80 eV laboratory frame energy).

| RNA       | % in solution | % from CAD       |
|-----------|---------------|------------------|
| <b>16</b> | 32.14         | 29.74 $\pm$ 0.47 |
| <b>17</b> | 32.14         | 31.36 $\pm$ 1.32 |
| <b>4</b>  | 35.72         | 38.90 $\pm$ 0.85 |

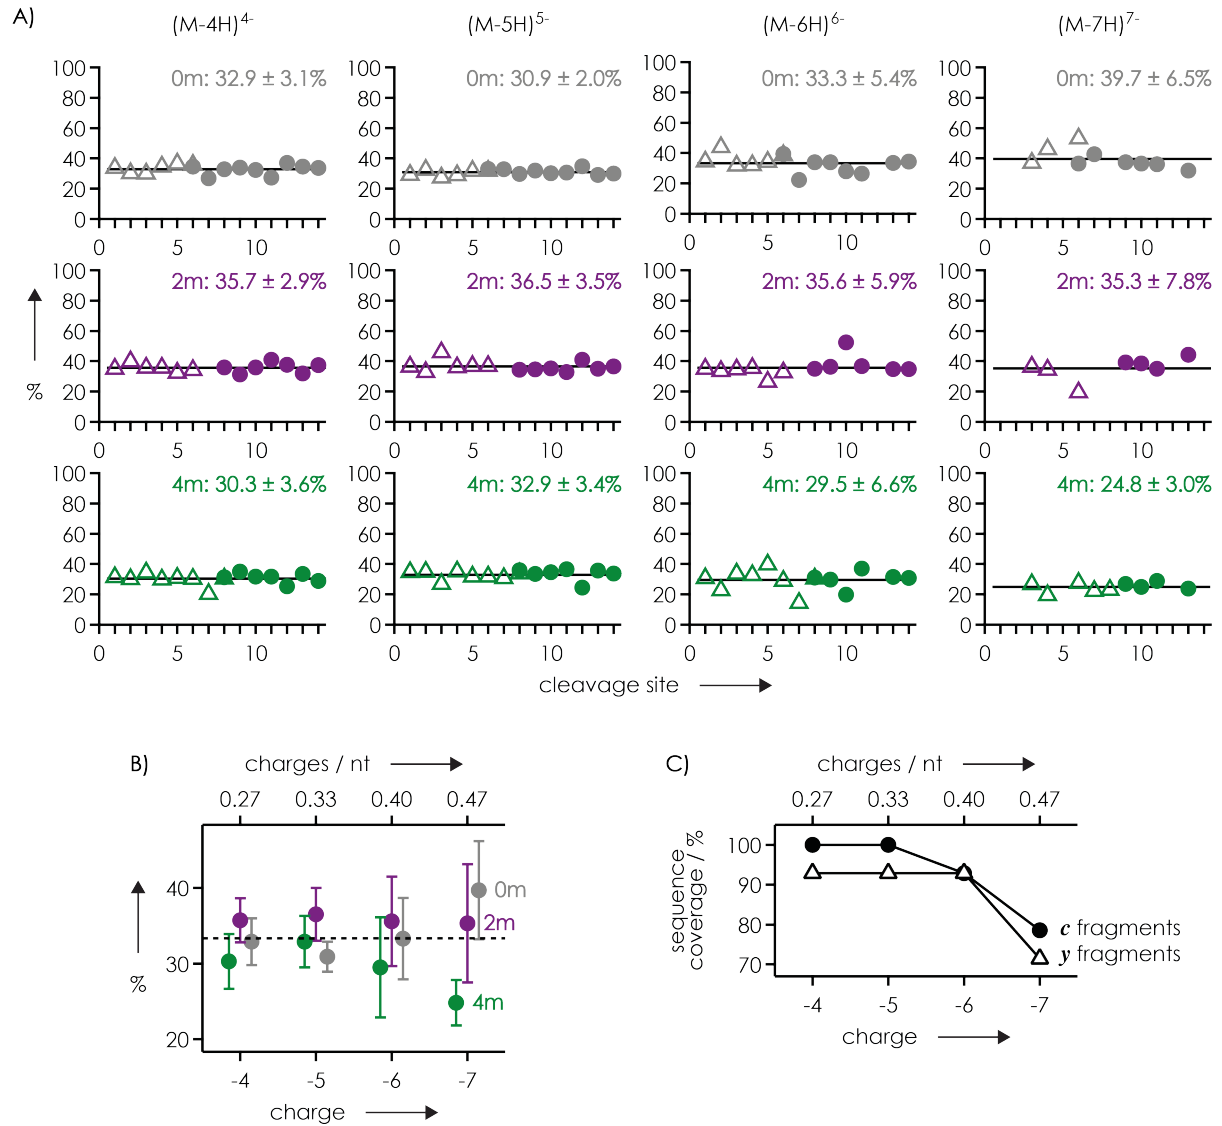

**Figure S1.** A) Fraction of *c* (circles) and *y* (triangles) fragments with 0 to 4 methylations from CAD of (M-*n*H)<sup>*n-*</sup> ions electrosprayed from 1:1:1 mixtures of 15 nt RNAs **1**, **2**, and **3** in 1:1 H<sub>2</sub>O/CH<sub>3</sub>OH with 20 mM piperidine and 20 mM imidazole as additive versus cleavage site; B) average fractions with standard deviations shown as error bars and C) sequence coverage from *c* (circles) and *y* (triangles) fragments versus (M-*n*H)<sup>*n-*</sup> ion charge. Color coding refers to the number of m<sup>5</sup>U residues: gray for 0 (RNA **1**), violet for 2 (RNA **2**), and green for 4 (RNA **3**).

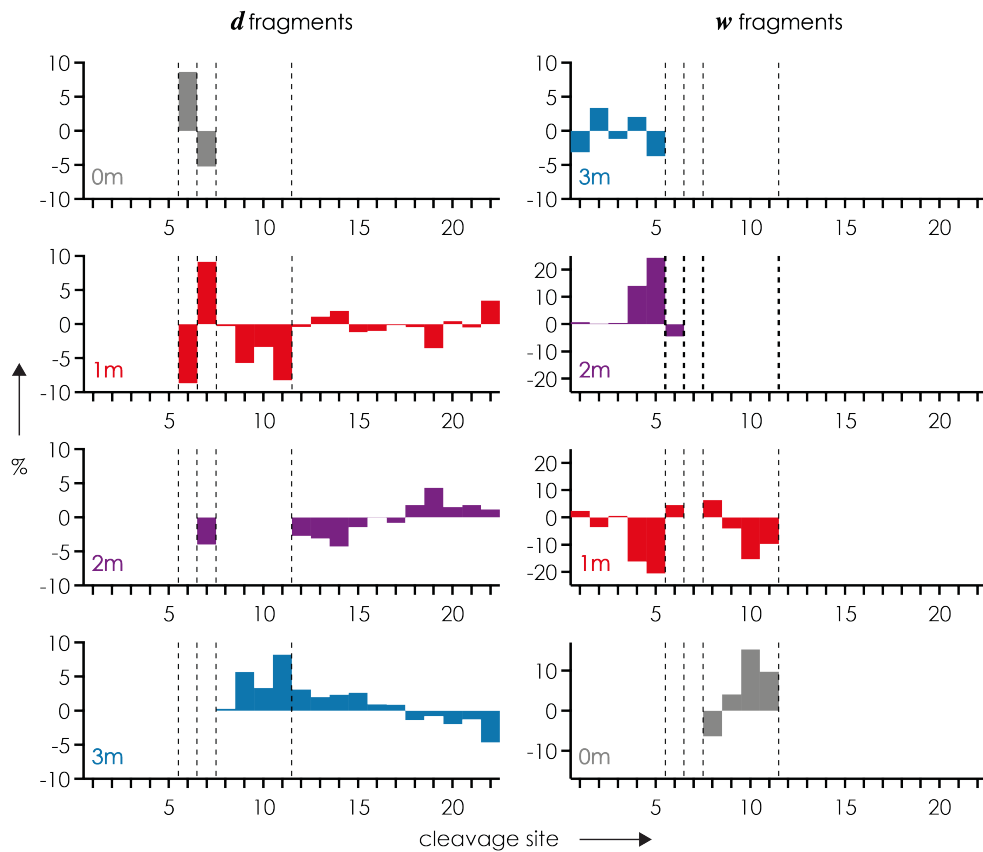

**Figure S2.** Deviations of  $d$  (left) and  $w$  (right) fragment yields from theoretical values (33.3 or 66.7%) from EDD of  $(M-12H)^{12-}$  ions of a 1:1:1 mixture of the 23 nt RNA forms **4**, **5**, and **6** with 1, 2, and 3  $m^6A$  residues, respectively, versus cleavage site; color coding indicates the number of methylations: gray=0, red=1, purple=2, blue=3; dashed lines mark cleavage sites next to  $m^6A$  residues at positions 6, 7, 8, and 12.

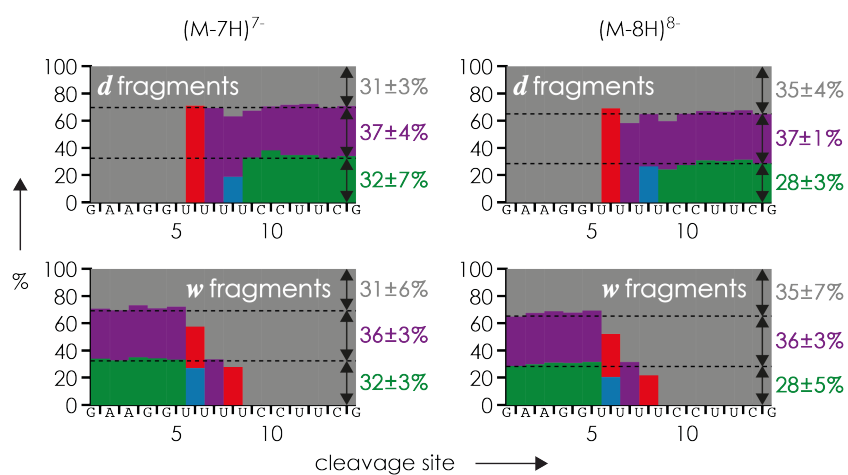

**Figure S3.** Fractions of *d* (top) and *w* (bottom) fragments from EDD of (M-7H)<sup>7-</sup> (left, average from three measurements at 24, 26, and 26 eV electron energy) and (M-8H)<sup>8-</sup> (right, average from three measurements at 22, 24, and 26 eV electron energy) ions from ESI of a 1:1:1 mixture of the 15 nt RNA forms **1**, **2**, and **3** with 0, 2, and 4 m<sup>5</sup>U residues, respectively, 0.5 μM each, in 1:1 H<sub>2</sub>O/CH<sub>3</sub>OH with 20 mM piperidine versus cleavage site; color coding indicates the number of methylations of a fragment: gray=0, red=1, purple=2, blue=3, green=4.
